# Supplementary material for: Highly efficient and selective extraction of gold by a fluorinated imine-based covalent organic polymer
Source: Royal Society of Chemistry journal article supplement (doi:10.1039/d4nj03609c), 2024-01-01
Supplement: d4nj03609c1.pdf [file d4nj03609c1.pdf]

Supplementary Information

**Highly efficient and selective extraction of gold by fluorinated imine-based covalent organic polymer**

Lijun Li<sup>a</sup>, Qiwen Deng<sup>a</sup>, Xiaomei Wang<sup>a</sup>, Yuling Yang<sup>a</sup>, Hao Chen<sup>a</sup>, An Li<sup>a</sup>, Kun Liu<sup>a</sup>, Wenjun Yi<sup>b</sup>, Congshan Zhou<sup>\*a</sup>, Yongbing Yuan<sup>\*a</sup>

*a* College of Chemistry and Chemical Engineering, Hunan Institute of Science and Technology, 414000, Yueyang, Hunan People's Republic of China

*b* College of Materials Science and Engineering, Changsha University of Science & Technology, 410082, Changsha, Hunan People's Republic of China

\* **Corresponding author. Email:** [zhoucongsh@126.com](mailto:zhoucongsh@126.com), [ybyuan0108@163.com](mailto:ybyuan0108@163.com)

Table S1 Atomic percentage of N-TFACOP

Table S1 Atomic percentage of N-TFACOP

| Name    | C     | F     | N    | O    |
|---------|-------|-------|------|------|
| Atomic% | 76.21 | 11.23 | 9.48 | 3.08 |

Fig. S1 Pore size distribution graph of N-TFACOP

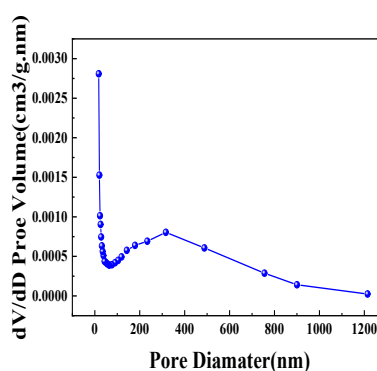

Fig. S1 Pore size distribution graph of N-TFACOP
